## 40 **Highlights**

- 41 ● Mosquitoes have evolved to cope with heat stress associated with warm blood ingestion
- 42 ● *Culex quinquefasciatus* displays heterothermy while blood-feeding
- 43 ● The abdominal temperature decreases due to evaporative cooling using urine droplets
- 44 ● Overall, the mosquito body temperature is much cooler than the ingested blood

45  
46  
47  
48  
49  
50  
51  
52  
53  
54  
55  
56  
57  
58  
59  
60  
61  
62  
63  
64  
65  
66  
67  
68  
69  
70  
71  
72  
73  
74  
75  
76  
77  
78  
79

80 **Abstract**

81 Mosquitoes are regarded as one of the most dangerous animals on earth. As they are responsible  
82 for the spread of a wide range of both human and animal diseases, research of the underlying  
83 mechanisms of their feeding behavior and physiology is critical. Among disease vector  
84 mosquitoes, *Culex quinquefasciatus*, which is a known carrier of West Nile virus and Western  
85 Equine Encephalitis, remains relatively understudied. As blood sucking insects, adaptations (either  
86 at the molecular or physiological level) while feeding on warm blood is crucial to their survival,  
87 as overheating can result in death due to heat stress. Our research aims to study how *Cx.*  
88 *quinquefasciatus* copes with heat associated with the ingestion of a warm blood-meal and to  
89 possibly uncover the adaptations this species uses to avoid thermal stress. Through the use of  
90 thermographic imaging, we analyzed the body temperature of *Cx. quinquefasciatus* while blood  
91 feeding. Infrared thermography has allowed us to identify a cooling strategy, evaporative cooling  
92 via the production of fluid droplets, and an overall low body temperature in comparison to the  
93 blood temperature during feeding. Understanding *Cx. quinquefasciatus*' adaptations and various  
94 strategies that they employ to reduce their body temperature while blood-feeding constitutes the  
95 first step towards the discovery of potential targets of opportunity for their control.

96

97

98

99

100

101

102

## 103 1. INTRODUCTION

104 Mosquitoes are the deadliest animal on the planet, killing an estimated 1 million people per  
105 year (WHO, 2020). Mosquitoes vector several pathogens responsible for devastating diseases,  
106 such as malaria, spread by *Anopheles* spp., and dengue, chikungunya, and Zika, spread primarily  
107 by *Aedes* spp (Reviewed by Reinhold *et al.*, 2018; WHO, 2020). West Nile virus (WNV), which  
108 has had an increase in cases by 25% in the last few years, and other diseases causing encephalitis  
109 are mainly spread by *Culex* spp. (CDC, 2019; WHO, 2020). Vaccines and treatments have either  
110 not been developed or are limited in efficacy for these diseases, thus vector control remains the  
111 primary method of prevention (WHO 2020). *Culex quinquefasciatus* (Say, 1823) (previously  
112 *Culex pipiens fatigans*), or the southern house mosquito, is part of the *Culex pipiens* complex and  
113 inhabits tropical and subtropical regions of the World including the Americas, Africa, the Middle  
114 East, Asia and Australia (Samy *et al.*, 2016). As a part of this complex, it is one of the primary  
115 vectors for WNV (Kent *et al.*, 2010; Molaei *et al.*, 2007), St. Louis encephalitis (SLE) (Diaz *et al.*,  
116 2013; Meyer *et al.*, 1983), Western equine encephalitis (WEE) in China (Wang *et al.*, 2012) and  
117 Japanese encephalitis (dos Santos Malafrente, 2003; Nitatpattana *et al.*, 2005). This species also  
118 vectors an insect-specific virus, *Culex flavivirus* (CxFV) (Hoyos-Lopez *et al.*, 2016, Farfan-Ale *et*  
119 *al.*, 2010), which may increase the likelihood of infection and the transmission of WNV (Kent *et*  
120 *al.*, 2010; Newman *et al.*, 2011). Moreover, *Cx. quinquefasciatus* is the primary vector for the  
121 parasite *Wuchereria bancrofti*, the causative agent of lymphatic filariasis (Reviewed by Farajollahi  
122 *et al.*, 2011; Tritteraprapab *et al.*, 2000; Vythilingam *et al.*, 2005). While this species is an  
123 important disease vector, it is often ignored in favor of research for *Cx. pipiens*. This could be  
124 largely due to the geographic distribution of the two species, *Cx. pipiens* occupying more northern,  
125 and, often, more wealthy countries than *Cx. quinquefasciatus* (Vinogradova, 2000). Climate

126 change could potentially affect the distribution of *Cx. quinquefasciatus*, allowing it to spread  
127 further north into the US (Samy *et al.*, 2016). This species feeds primarily on birds, taking a blood  
128 meal from mammals (typically humans and dogs) occasionally (Garcia-Rejon *et al.*, 2010, Molaei  
129 *et al.*, 2007). However, depending on the region the species is in and host availability, it has also  
130 been described as anthropophilic (Dixit *et al.*, 2001; Hamon, 1963; Subra, 1970). This species is  
131 nocturnal and is commonly found in urban areas, feeding both endo- and exophagously (Hamon,  
132 1963; Subra, 1970), and they will often take more than one blood meal, increasing chances for  
133 pathogen transmission (Subra, 1981). Although this is a species that feeds exclusively on warm-  
134 blooded vertebrates (particularly birds, which tend to have warmer body temperatures than  
135 humans), the mechanism by which this mosquito tolerates a warm blood meal several times in its  
136 lifetime is unknown.

137         Temperature is a critical abiotic factor affecting mosquito biological, behavioral and  
138 physiological processes (Reinhold *et al.*, 2018). As poikilotherms, these organisms do not maintain  
139 a stable body temperature and are dependent on the environmental temperature. All insects have  
140 an optimum temperature at which they can perform properly (Mellanby, 1939; Upshur *et al.*,  
141 2019). However, since environmental temperature is not consistent, animals must adjust to prevent  
142 freezing or desiccation. Insects are particularly vulnerable to temperature changes as their open  
143 circulatory and respiratory systems leave them susceptible to desiccation (Headlee, 1914; Rolandi  
144 *et al.*, 2014). Many insects have evolved strategies for surviving through or avoiding cold  
145 temperatures, which range from moving to a warmer area (*i.e.*, basking) (Kent *et al.*, 2004) to  
146 physiological changes (*e.g.*, diapause, cryoprotectants, etc.) (Heinrich, 1995) to actively moving  
147 muscles, particularly flight muscles, in order to produce heat (*i.e.*, shivering) (Esch, 1988; Heinrich  
148 and Kammer, 1973). On the other hand, an ambient temperature that is too high can cause the

149 insect to slow activity to avoid overheating and desiccation (Heinrich and Esch, 1994; Upshur *et*  
150 *al.*, 2019). Bumblebees (*Bombus vosnesenskii*) are known to transfer heat from the thorax to the  
151 abdomen (or vice versa) in order to cool the thorax (or abdomen) when reaching a high temperature  
152 (Heinrich 1976). Additionally, Heinrich showed that honeybees (*Apis mellifera*) use evaporative  
153 cooling by regurgitating and releasing droplets through the ventral portion of the head to evaporate  
154 (1980a) and that these bees cool their thorax by transferring heat to the head, which can then cool  
155 with evaporative cooling (1980b). However, some insects, such as blood-sucking insects, have to  
156 face a sudden increase of their body temperature associated with blood intake from a warm-  
157 blooded host (Benoit *et al.*, 2011; Beyenbach and Piermarini 2011).

158 Hematophagous insects have developed a necessity to feed on blood. These insects may  
159 need a blood meal because it is a sole nutrient source, like in kissing bugs (Rabinovich *et al.*,  
160 2011), or for advancement to the next life stage, like in bed bugs (Reinhardt and Siva-Jothy, 2007),  
161 or for nutrients in egg development, like in female mosquitoes (Reviewed by Adams, 1999; Gulia-  
162 Nuss *et al.*, 2015). While blood-feeding is already a risky behavior due to host defenses (Vinauger  
163 *et al.*, 2018), insects that feed on warm blooded vertebrates must face the risk of thermal stress in  
164 addition to evading host defenses (Beyenbach and Piermarini, 2011). However, some species have  
165 developed various coping mechanisms to avoid overheating during the sudden intake of a hot  
166 liquid (Benoit *et al.*, 2019). Insects can cool their body temperature during feeding using  
167 countercurrent heat exchange, like in *Rhodnius prolixus* (Lahondère *et al.*, 2017), or evaporative  
168 cooling, as in *Anopheles stephensi* (Lahondère and Lazzari, 2012). Another method consists of  
169 synthesizing heat shock proteins (HSPs) to prevent damage caused by heat stress post-feeding,  
170 which is used in *Aedes aegypti* (Benoit *et al.*, 2011; Lahondère and Lazzari, 2012), and *Cx. pipiens*  
171 (Benoit *et al.*, 2011). However, to our knowledge, nothing is known about the response to blood

172 intake in the closely related species, *Cx. quinquefasciatus*. In this study, we seek to determine how  
173 *Cx. quinquefasciatus* copes with the thermal stress associated with the intake of a warm blood  
174 meal using experimental blood feeding coupled with thermography. This allowed us to follow the  
175 evolution of the body temperature of the females while feeding and identify possible cooling  
176 mechanism.

177

## 178 2. MATERIALS AND METHODS

### 179 2.1. Mosquitoes

180 *Cx. quinquefasciatus* Say (Diptera: Culicidae) eggs (NR-43025, *Culex quinquefasciatus*,  
181 strain JHB) were received from the Center for Disease Control and Prevention (Atlanta, GA).  
182 Mosquitoes were reared from eggs, which were collected as rafts from the previous generation and  
183 hatched in a larval tray (BioQuip Products, Rancho Dominguez, CA) containing deionized water  
184 and Hikari First Bites powdered fish food (Kyori Food Industries, Japan). Mosquitoes were  
185 maintained in a climatic chamber at  $26 \pm 1^\circ\text{C}$ , 70% humidity and a 12:12 light cycle. The larvae  
186 were maintained in the trays and were isolated within 24 hours of pupation and then transferred to  
187 containers (BioQuip Products, Rancho Dominguez, CA) until emergence. The mosquitoes had *ad*  
188 *libitum* access to cotton balls soaked in 10% sucrose solution, which was removed before the  
189 experiments to increase the females' motivation to take a blood-meal. The females used for the  
190 study were 6-10 days old and starved for 24 hours before testing.

191

### 192 2.2. Experimental Blood Feeding

193 Mosquitoes were released into a covered 8 x 8 x 8" metal collapsible cage (BioQuip  
194 Products, Rancho Dominguez, CA) and allowed to feed on adult bovine blood (Lampire Biological

195 Laboratories, Pipersville, PA). Blood was placed into a water bath-heated glass blood feeder (D.E.  
196 Lillie Glassblowers, Atlanta, GA, USA), covered with a Parafilm membrane (Bemis Company,  
197 Inc, Neenah, WI, USA). The water bath (Jublo Corio Open Heating Bath Circulators, Thomas  
198 Scientific, Swedesboro, NJ) was heated to 41°C, and the blood was warmed to  $37 \pm 1^\circ\text{C}$  before  
199 mosquitoes were released in the cage (Fig. 1). The mosquitoes that fed on the membrane were  
200 filmed using a FLIR T540 thermographic camera (FLIR Systems, Wilsonville, OR) at a 30 frames  
201 / second rate.

202

### 203 **2.3. Video and Data Analyses**

204 The videos (in .csq format) recorded with the thermographic camera were analyzed using  
205 the ResearchIR software (FLIR). For each mosquito, a region of interest (ROI) point was selected  
206 on the center of head, thorax, and abdomen. The software tracked the changes and evolution of the  
207 body temperature of the 3 ROIs during blood-feeding, frame by frame. For each mosquito, 10  
208 frames were randomly selected per body segment and averaged for each mosquito. These data  
209 were then pooled ( $N = 10$ ) and were compared with pairwise Student *t*-tests using the software R  
210 (R software, version 3.6.3).

211

## 212 **3. RESULTS**

213 Prior to landing on the blood feeder, the body temperature ( $T_b$ ) of the mosquito matched the  
214 ambient temperature ( $T_a$ ) (Figure 2A), and the temperature of the head ( $T_h$ ), the thorax ( $T_{th}$ ), and  
215 the abdomen ( $T_{ab}$ ) were all within one degree Celsius of each other (Figure 2A'). After landing,  
216 the mosquito quickly warmed up purely based on contact with the feeder. Once feeding began,  $T_h$ ,  
217  $T_{th}$ , and  $T_{ab}$  gradually increased (Figure 2B), and the temperatures of the three sections were



218 increasingly different, a phenomenon known as heterothermy (Figure 2B'). As feeding continues,  
219  $T_h$  ( $30.8 \pm 1.1$  °C) was significantly higher than  $T_{th}$  ( $29.8 \pm 1.1$  °C) (Student  $t$  test,  $t = 7.4867$ ,  $df =$   
220  $9$ ,  $p$ -value =  $<0.001$ ) and  $T_{ab}$  ( $28.8 \pm 1.1$  °C) (Student  $t$  test,  $t = 10.377$ ,  $df = 9$ ,  $p$ -value =  $<0.001$ ).  
221  $T_{th}$  and  $T_{ab}$  were also significantly different from one another (Student  $t$  test,  $t = 6.0507$ ,  $df = 9$ ,  $p$ -  
222 value =  $<0.001$ ) (Figures 3 and 4). Interestingly, *Cx. quinquefasciatus*'  $T_h$  was lower than other  
223 hematophagous insects when feeding on blood at the same temperature (*i.e.*, 37°C) (Table 1). In  
224 some mosquitoes, we also noticed the excretion of droplets at the end of the abdomen during  
225 feeding (*i.e.*, prediuresis), some of which remained attached to the tip of the abdomen (Figure 5A).  
226 Retaining the droplet resulted in a decrease in  $T_{ab}$  (Figure 5B). After the mouthparts were retracted  
227 from the feeder membrane,  $T_b$  gradually decreased and began to return to  $T_a$  (Figure 2C). After  
228 feeding stopped,  $T_h$ ,  $T_{th}$ , and  $T_{ab}$  were close to ambient temperature (Figure 2C'). We also  
229 measured the duration of feeding in *Cx. quinquefasciatus* (Table 1). At greater than 3 minutes on  
230 average, this species took slightly longer than most other warm-blood feeding mosquitoes to  
231 imbibe a blood meal at 37°C. However, it remains much less than the mosquito *Cx. territans*,  
232 which primarily feeds on cold-blooded animals including frogs and snakes, or other  
233 hematophagous insects (Table 1).

234

#### 235 4. DISCUSSION

236 In the present study, we showed that *Cx. quinquefasciatus* displays heterothermy, a  
237 temperature gradient along the body segments, while feeding on warm blood. This has been  
238 observed in several hematophagous insect species, but the underlying mechanisms can vary  
239 (Benoit *et al.*, 2019; Lahondère and Lazzari, 2013). Countercurrent heat exchange is mostly seen  
240 in the literature as a method of heat conservation (*e.g.*, Casey, 1988; Heinrich, 1995), but

241 Lahondère *et al.* (2017) showed that the kissing bug, *Rhodnius prolixus*, uses countercurrent heat  
242 exchange to cool its abdomen down while feeding. Cool hemolymph is pumped from the abdomen  
243 to the head through the heart and aorta, which comes into contact with the esophagus in the head.  
244 The hot ingested blood circulating into the esophagus transfers some of its heat to the hemolymph  
245 in the aorta, which helps to cool the blood before it reaches the crop. Another strategy, evaporative  
246 cooling, consists of excreting and retaining droplets of fluid in order to cool down (Heinrich,  
247 1980a; Prange, 1996). Several hematophagous arthropods, including sandflies (Sadlova *et al.*,  
248 2013), mosquitoes (Lahondère and Lazzari, 2012) and ticks (Lazzari *et al.*, 2020), use this method  
249 to cool down during blood intake. Mosquitoes use prediuresis droplets for evaporative cooling, in  
250 which the insect excretes a droplet composed of fresh blood and urine and holds it at the tip of the  
251 abdomen to cool down (Lahondère and Lazzari, 2012). In *An. stephensi*, prediuresis is observed  
252 during blood intake, and keeping the droplet to perform evaporative cooling occurs in most  
253 individuals (Lahondère and Lazzari, 2012; 2013). In the present study, we noted only a small  
254 percentage of *Cx. quinquefasciatus* displaying this behavior. Future experiments in which  
255 mosquitoes are fed with blood at different temperatures will inform whether evaporative cooling  
256 occurrence is dependent on the temperature of the host blood.

257         While most species of hematophagous insects have a head temperature close to the  
258 temperature of the blood while feeding, here, we noted that *Cx. quinquefasciatus*' head  
259 temperature was much lower than that of the blood. Lahondère and Lazzari showed a few degree  
260 difference between the blood temperature and the mosquito head temperature (in this case, *Ae.*  
261 *aegypti* and *An. stephensi*) (2012) or the tsetse fly *Glossina morsitans* (<2°C difference) (2015),  
262 whereas we observed a much larger difference (~6°C on average). This suggests that *Cx.*  
263 *quinquefasciatus* has developed a way to cool blood down before it reaches the head. While this

264 has not been seen in mosquitoes, cooling of the head has been seen in honeybees, which use  
265 evaporative cooling by releasing droplets from the ventral portion of the head (Heinrich, 1980a).  
266 We put forth the hypothesis that the ingestion pumps in *Cx. quinquefasciatus* may have a  
267 specialized function that may play a role in this. Investigating the pumps' anatomy and function  
268 during blood ingestion will provide insights into the mechanisms underlying heterothermy in *Cx.*  
269 *quinquefasciatus* (Kikuchi *et al.*, 2018; Lahondère *et al.*, 2017). Another possibility is that *Cx.*  
270 *quinquefasciatus* could be controlling its body temperature by intaking the blood more slowly than  
271 other mosquito species. Chadee *et al.* (2002) found both fast and slow feeders in *Ae. aegypti* (less  
272 than or greater than 2 minutes, respectively), whereas *Cx. quinquefasciatus* took an average of 3  
273 minutes to take a full meal (Table 1). This slower feeding time could allow the blood to lose heat  
274 through the cuticle of the stylets as the mosquito ingests the blood meal.

275         To avoid heat stress associated with the ingestion of a warm blood meal, mosquitoes can  
276 shift their host preference and select relatively cooler blood to feed on. We made some  
277 observations of mosquitoes seemingly preferring to feed on the outer rim of the blood feeder,  
278 where the blood is slightly cooler. This behavior has been seen with hosts as well, as Oduola and  
279 Awe (2006) found that *Cx. quinquefasciatus* prefers to feed on the foot and ankle rather than the  
280 calf and thigh, which could be due to odorants produced by the foot, but it may also be affected by  
281 the lower temperature of the extremities (Aminoff *et al.*, 2018). Host or biting site selection, *i.e.*,  
282 preferring to feed on the lowest temperature area available, may also contribute to evaporative  
283 cooling droplet formation, where mosquitoes forced to feed on warmer blood may be more likely  
284 to form a droplet. Comparing the feeding behavior of *Cx. quinquefasciatus* at varying temperatures  
285 will allow us to test this hypothesis. It is worth mentioning that when we analyzed the feeding

286 activity of the closely related cold-blooded feeding mosquito, *Culex territans*, we found that this  
287 species takes 13 times longer to feed to repletion than *Cx. quinquefasciatus* (Table 1).

288 *Cx. quinquefasciatus* may also synthesize heat shock proteins (HSPs), which typically  
289 function as chaperone proteins to prevent damage to existing proteins during times of stress, to  
290 recover from ingestion of a hot blood meal. Because the production of HSPs in response to thermal  
291 stress is a highly conserved physiological response to heat stress throughout the animal kingdom  
292 (Pereira *et al.*, 2017), and *Cx. pipiens* has been shown to use these proteins after ingesting a hot  
293 blood-meal (Benoit *et al.*, 2011), we suggest that *Cx. quinquefasciatus* might also respond to heat  
294 stress in this way. Tsetse flies have been shown to synthesize HSPs (Roma *et al.*, 2019) and several  
295 mosquito species, including *Ae. aegypti* and *Culex pipiens*, use this method to recover from the  
296 stress caused by rapid intake of a warm meal (Benoit *et al.*, 2011; Lahondère and Lazzari, 2012).  
297 In kissing bugs, it has been shown that both exposure to heat and blood feeding trigger the synthesis  
298 of HSP70 (Paim *et al.* 2016). Moreover, several species of hard and soft ticks also synthesize HSPs  
299 to recover from heat stress (Guilfoile and Packila, 2004; Busby *et al.* 2012; Oleaga *et al.*, 2017). It is  
300 thus likely that *Cx. quinquefasciatus* is synthesizing HSPs in response to the intake of a hot blood  
301 meal in addition to evaporative cooling and possibly other cooling mechanisms yet unknown.

302

## 303 5. CONCLUSIONS

304 *Cx. quinquefasciatus* plays a large role in disease transmission across the world. To our  
305 knowledge, this study is the first focusing on the thermal biology of this mosquito species. We  
306 showed that this mosquito cools down during blood-feeding in part via evaporative cooling of  
307 urine droplets. Understanding the biology of this mosquito, particularly of its feeding behavior and  
308 physiology, can lead to more integrative pest management methods in order to control this vector.

309

310 **Conflict of interest**

311 The authors have no conflict of interest to disclose.

312

313 **Acknowledgements**

314 We are grateful to members of the Vinauger lab and the Lahondère lab for mosquito colony care.

315 The following reagent was provided by Centers for Disease Control and Prevention for distribution

316 by BEI Resources, NIAID, NIH: *Culex quinquefasciatus*, Strain JHB, Eggs, NR-43025. Figure 1

317 was created with BioRender.com. Funding sources: The Global Change Center (C.L. and R.S), the

318 Fralin Life Sciences Institute (C.L.) and the Department of Biochemistry (C.L.) at Virginia Tech.

319

320

321 **References**

322

323 Adams, T. S. (1999). Hematophagy and hormone release. *Annals of the Entomological Society of*  
324 *America*, 92(1), 1-13.

325

326 Aminoff, M. J., Boller, F., Swaab, D. F., Romanovsky, A. A., Garami, A. *et al.* (2018).  
327 Thermoregulation: from basic neuroscience to clinical neurology. *ed.* Andrej A. Romanovsky,  
328 Elsevier. 496pp.

329

330 Balvín, O., Munclinger, P., Kratochvíl, L., & Vilímová, J. (2012). Mitochondrial DNA and  
331 morphology show independent evolutionary histories of bedbug *Cimex lectularius* (Heteroptera:  
332 Cimicidae) on bats and humans. *Parasitology Research*, 111(1), 457-469.

333

334 Benoit, J. B., Lopez-Martinez, G., Patrick, K. R., Phillips, Z. P., Krause, T. B. *et al.* (2011).  
335 Drinking a hot blood meal elicits a protective heat shock response in mosquitoes. *Proceedings of*  
336 *the National Academy of Sciences*, 108(19), 8026-8029.

337

338 Benoit, J. B., Lazzari, C. R., Denlinger, D. L., & Lahondère, C. (2019). Thermoprotective  
339 adaptations are critical for arthropods feeding on warm-blooded hosts. *Current opinion in insect*  
340 *science*, 34, 7-11.

341

- 342 Beyenbach, K. W., & Piermarini, P. M. (2011). Transcellular and paracellular pathways of  
343 transepithelial fluid secretion in Malpighian (renal) tubules of the yellow fever mosquito *Aedes*  
344 *aegypti*. *Acta Physiologica*, 202(3), 387-407.  
345
- 346 Busby, A. T., Ayllón, N., Kocan, K. M., Blouin, E. F., De La Fuente, G. *et al.* (2012). Expression  
347 of heat shock proteins and subolesin affects stress responses, *Anaplasma phagocytophilum*  
348 infection and questing behaviour in the tick, *Ixodes scapularis*. *Medical and Veterinary*  
349 *Entomology*, 26(1), 92-102.  
350
- 351 Casey, T. M. (1988). Thermoregulation and heat exchange. *Advances in Insect Physiology*, 20,  
352 119-146.  
353
- 354 Center for Disease Control and Prevention, 2019. West Nile virus and other domestic nationally  
355 notifiable arboviral diseases- -United States, 2018.  
356 [https://www.cdc.gov/mmwr/volumes/68/wr/mm6831a1.htm?s\\_cid=mm6831a1\\_e&deliveryName=USCDC\\_921-DM6573](https://www.cdc.gov/mmwr/volumes/68/wr/mm6831a1.htm?s_cid=mm6831a1_e&deliveryName=USCDC_921-DM6573).  
357  
358
- 359 Chadee, D. D., Beier, J. C., & Mohammed, R. T. (2002). Fast and slow blood-feeding durations  
360 of *Aedes aegypti* mosquitoes in Trinidad. *Journal of Vector Ecology*, 27, 172-177.  
361
- 362 Diaz, L. A., Flores, F. S., Beranek, M., Rivarola, M. E., Almirón, W. R. *et al.* (2013). Transmission  
363 of endemic St Louis encephalitis virus strains by local *Culex quinquefasciatus* populations in  
364 Cordoba, Argentina. *Transactions of the Royal Society of Tropical Medicine and Hygiene*, 107(5),  
365 332-334.  
366
- 367 Dixit, V., Gupta, A. K., Kataria, O. M., & Prasad, G. B. (2001). Host preference of *Culex*  
368 *quinquefasciatus* in Raipur city of Chattisgarh state. *The Journal of Communicable Diseases*,  
369 33(1), 17-22.  
370
- 371 dos Santos Malafrente, R., Calvo, E., James, A. A., & Marinotti, O. (2003). The major salivary  
372 gland antigens of *Culex quinquefasciatus* are D7-related proteins. *Insect biochemistry and*  
373 *molecular biology*, 33(1), 63-71.  
374
- 375 Esch, H. (1988). The effects of temperature on flight muscle potentials in honeybees and cuculiinid  
376 winter moths. *Journal of Experimental Biology*, 135(1), 109-117.  
377
- 378 Farfan-Ale, J. A., Llorono-Pino, M. A., Garcia-Rejon, J. E., Soto, V., Lin, M. *et al.* (2010).  
379 Detection of flaviviruses and orthobunyaviruses in mosquitoes in the Yucatan Peninsula of Mexico  
380 in 2008. *Vector-Borne and Zoonotic Diseases*, 10(8), 777-783.  
381

- 382 Farajollahi, A., Fonseca, D. M., Kramer, L. D., & Kilpatrick, A. M. (2011). “Bird biting”  
383 mosquitoes and human disease: a review of the role of *Culex pipiens* complex mosquitoes in  
384 epidemiology. *Infection, genetics and evolution*, 11(7), 1577-1585.  
385
- 386 Garcia-Rejon, J. E., Blitvich, B. J., Farfan-Ale, J. A., Loroño-Pino, M. A., Chim, W. A. C. *et al.*  
387 (2010). Host-feeding preference of the mosquito, *Culex quinquefasciatus*, in Yucatan State,  
388 Mexico. *Journal of Insect Science*, 10.  
389
- 390 Grossman, G. L., & Pappas, L. G. (1991). Human skin temperature and mosquito (Diptera:  
391 Culicidae) blood feeding rate. *Journal of medical entomology*, 28(3), 456-460.  
392
- 393 Guilfoile, P. G., & Packila, M. (2004). Identification of four genes expressed by feeding, female  
394 *Ixodes scapularis* including three with sequence similarity to previously recognized genes.  
395 *Experimental & applied acarology*, 32(1-2), 103-110.  
396
- 397 Gulia-Nuss, M., Elliot, A., Brown, M. R., & Strand, M. R. (2015). Multiple factors contribute to  
398 anautogenous reproduction by the mosquito *Aedes aegypti*. *Journal of insect physiology*, 82, 8-16.  
399
- 400 Hamon, J. (1963). Les moustiques anthropophiles de la région de Bobo Dioulasso, République de  
401 Haute Volta. *Annals de la Société Entomologique de France*. 85-145.  
402
- 403 Headlee, T. J. (1914). Some data on the effect of temperature and moisture on the rate of insect  
404 metabolism. *Journal of Economic Entomology*, 7, 413.  
405
- 406 Heinrich, B. (1976). Heat exchange in relation to blood flow between thorax and abdomen in  
407 bumblebees. *Journal of Experimental Biology*, 64(3), 561-585.  
408
- 409 Heinrich, B. (1980a). Mechanisms of body-temperature regulation in honeybees, *Apis mellifera*:  
410 I. Regulation of head temperature. *Journal of Experimental Biology*, 85(1), 61-72.  
411
- 412 Heinrich, B. (1980b). Mechanisms of body-temperature regulation in honeybees, *Apis mellifera*.  
413 II. Regulation of thoracic temperature at high air temperatures. *Journal of Experimental Biology*,  
414 85, 73-87.  
415
- 416 Heinrich, B. (1995). Insect thermoregulation. *Endeavour*, 19(1), 28-33.  
417
- 418 Heinrich, B., & Esch, H. (1994). Thermoregulation in bees. *American Scientist*, 82(2), 164-170.  
419
- 420 Heinrich, B., & Kammer, A. E. (1973). Activation of the fibrillar muscles in the bumblebee during  
421 warm-up, stabilization of thoracic temperature and flight. *Journal of Experimental Biology*, 58(3),  
422 677-688.

- 423  
424 Hoyos-López, R., Suaza-Vasco, J., Rúa-Uribe, G., Uribe, S., & Gallego-Gómez, J. C. (2016).  
425 Molecular detection of flaviviruses and alphaviruses in mosquitoes (Diptera: Culicidae) from  
426 coastal ecosystems in the Colombian Caribbean. *Memórias do Instituto Oswaldo Cruz*, 111(10),  
427 625-634.  
428
- 429 Kemp, D. J., & Krockenberger, A. K. (2004). Behavioural thermoregulation in butterflies: the  
430 interacting effects of body size and basking posture in *Hypolimnas bolina* (L.)(Lepidoptera:  
431 Nymphalidae). *Australian journal of Zoology*, 52(3), 229-239.  
432
- 433 Kent, R. J., Crabtree, M. B., & Miller, B. R. (2010). Transmission of West Nile virus by *Culex*  
434 *quinquefasciatus* (Say) infected with Culex Flavivirus Izabal. *PLoS neglected tropical diseases*,  
435 4(5).  
436
- 437 Kikuchi, K., Stremler, M. A., Chatterjee, S., Lee, W. K., Mochizuki, O. *et al.* (2018). Burst mode  
438 pumping: A new mechanism of drinking in mosquitoes. *Scientific reports*, 8(1), 1-15.  
439
- 440 Lahondère, C., & Lazzari, C. R. (2012). Mosquitoes cool down during blood feeding to avoid  
441 overheating. *Current biology*, 22(1), 40-45.  
442
- 443 Lahondère, C., & Lazzari, C. R. (2013). Thermal stress and thermoregulation during feeding in  
444 mosquitoes. In *Anopheles mosquitoes - New insights into malaria vectors*. IntechOpen.  
445
- 446 Lahondère, C., & Lazzari, C. R. (2015). Thermal effect of blood feeding in the telmophagous fly  
447 *Glossina morsitans morsitans*. *Journal of thermal biology*, 48, 45-50.  
448
- 449 Lahondère, C., Insausti, T. C., Paim, R. M., Luan, X., Belev, G. *et al.* (2017). Countercurrent heat  
450 exchange and thermoregulation during blood-feeding in kissing bugs. *Elife*, 6, e26107.  
451
- 452 Lazzari, C.R., Fauquet, A., Lahondère, C, Araujo, R. & M.H. Pereira. Soft ticks perform  
453 evaporative cooling during blood-feeding (2020). *BioRxiv*.  
454 <https://doi.org/10.1101/2020.06.30.180968>.  
455
- 456 Mellanby, K. (1939). Low temperature and insect activity. *Proceedings of the Royal Society of*  
457 *London. Series B-Biological Sciences*, 127(849), 473-487.  
458
- 459 Mellink, J. J., Poppe, D. M. C., & Van Duin, G. J. T. (1982). Factors affecting the blood-feeding  
460 process of a laboratory strain of *Aedes aegypti* on rodents. *Entomologia Experimentalis et*  
461 *Applicata*, 31(2-3), 229-238.  
462



- 463 Meyer, R. P., Hardy, J. L., & Presser, S. B. (1983). Comparative vector competence of *Culex*  
464 *tarsalis* and *Culex quinquefasciatus* from the Coachella, Imperial, and San Joaquin Valleys of  
465 California for St. Louis encephalitis virus. *The American journal of tropical medicine and hygiene*,  
466 32(2), 305-311.  
467
- 468 Molaei, G., Andreadis, T. G., Armstrong, P. M., Bueno Jr, R., Dennett, J. A. *et al.* (2007). Host  
469 feeding pattern of *Culex quinquefasciatus* (Diptera: Culicidae) and its role in transmission of West  
470 Nile virus in Harris County, Texas. *The American journal of tropical medicine and hygiene*, 77(1),  
471 73-81.  
472
- 473 Newman, C. M., Cerutti, F., Anderson, T. K., Hamer, G. L., Walker, E. D. *et al.* (2011). *Culex*  
474 flavivirus and West Nile virus mosquito coinfection and positive ecological association in  
475 Chicago, United States. *Vector-Borne and Zoonotic Diseases*, 11(8), 1099-1105.  
476
- 477 Nitatpattana, N., Apiwathnasorn, C., Barbazan, P., Leemingsawat, S., Yoksan, S. *et al.* (2005).  
478 First isolation of Japanese encephalitis from *Culex quinquefasciatus* in Thailand. *Southeast Asian*  
479 *journal of tropical medicine and public health*, 36(4), 875.  
480
- 481 Oduola, A. O., & Awe, O. O. (2006). Behavioural biting preference of *Culex quinquefasciatus* in  
482 human host in Lagos metropolis Nigeria. *Journal of vector borne diseases*, 43(1), 16.  
483
- 484 Oleaga, A., Obolo-Mvoulouga, P., Manzano-Román, R., & Pérez-Sánchez, R. (2017). Functional  
485 annotation and analysis of the *Ornithodoros moubata* midgut genes differentially expressed after  
486 blood feeding. *Ticks and tick-borne diseases*, 8(5), 693-708.  
487
- 488 Paim, R. M., Araujo, R. N., Leis, M., Sant'Anna, M. R., Gontijo, N. F. *et al.* (2016). Functional  
489 evaluation of Heat Shock Proteins 70 (HSP70/HSC70) on *Rhodnius prolixus* (Hemiptera,  
490 Reduviidae) physiological responses associated with feeding and starvation. *Insect Biochemistry*  
491 *and Molecular Biology*, 77, 10-20.  
492
- 493 Pereira, M. H., Paim, R. M., Lahondère, C., & Lazzari, C. R. (2017). Heat Shock Proteins and  
494 Blood-Feeding in Arthropods. In *Heat Shock Proteins in Veterinary Medicine and Sciences* (pp.  
495 349-359). Springer, Cham.  
496
- 497 Ponlawat, A., & Harrington, L. C. (2005). Blood feeding patterns of *Aedes aegypti* and *Aedes*  
498 *albopictus* in Thailand. *Journal of medical entomology*, 42(5), 844-849.  
499
- 500 Prange, H. D. (1996). Evaporative cooling in insects. *Journal of Insect Physiology*, 42(5), 493-  
501 499.  
502

- 503 R: A language and environment for statistical computing. R Foundation for Statistical Computing,  
504 Vienna, Austria. URL <http://www.R-project.org/>.
- 505
- 506 Rabinovich, J. E., Kitron, U. D., Obed, Y., Yoshioka, M., Gottdenker, N. *et al.* (2011). Ecological  
507 patterns of blood-feeding by kissing-bugs (Hemiptera: Reduviidae: Triatominae). *Memorias Do*  
508 *Instituto Oswaldo Cruz*, 106(4), 479-494.
- 509
- 510 Reinhardt, K., & Siva-Jothy, M. T. (2007). Biology of the bed bugs (Cimicidae). *Annual Review*  
511 *of Entomology*, 52, 351-374.
- 512
- 513 Reinhold, J. M., Lazzari, C. R., & Lahondère, C. (2018). Effects of the environmental temperature  
514 on *Aedes aegypti* and *Aedes albopictus* mosquitoes: a review. *Insects*, 9(4), 158.
- 515
- 516 Rolandi, C., Iglesias, M. S., & Schilman, P. E. (2014). Metabolism and water loss rate of the  
517 haematophagous insect *Rhodnius prolixus*: effect of starvation and temperature. *Journal of*  
518 *Experimental Biology*, 217(24), 4414-4422.
- 519
- 520 Roma, J. S., D'souza, S., Somers, P. J., Cabo, L. F., Farsin, R., Aksoy, S., ... & Weiss, B. L. (2019).  
521 Thermal stress responses of *Sodalis glossinidius*, an indigenous bacterial symbiont of  
522 hematophagous tsetse flies. *PLoS neglected tropical diseases*, 13(11), e0007464.
- 523
- 524 Sadlova, J., Reishig, J., & Volf, P. (2013). Prediuresis in female *Phlebotomus* sandflies (Diptera:  
525 Psychodidae). *European Journal of Entomology*, 95(4), 643-647.
- 526
- 527 Samy, A. M., Elaagip, A. H., Kenawy, M. A., Ayres, C. F., Peterson, A. T. *et al.* (2016). Climate  
528 change influences on the global potential distribution of the mosquito *Culex quinquefasciatus*,  
529 vector of West Nile virus and lymphatic filariasis. *PloS one*, 11(10).
- 530
- 531 Sasaki, H., Rosales, R., & Tabaru, Y. (2003). Host feeding profiles of *Rhodnius prolixus* and  
532 *Triatoma dimidiata* in Guatemala (Hemiptera: Reduviidae: Triatominae). *Medical Entomology*  
533 *and Zoology*, 54(3), 283-289.
- 534
- 535 Savage, H. M., Aggarwal, D., Apperson, C. S., Katholi, C. R., Gordon, E. *et al.*, (2007). Host  
536 choice and West Nile virus infection rates in blood-fed mosquitoes, including members of the  
537 *Culex pipiens* complex, from Memphis and Shelby County, Tennessee, 2002–2003. *Vector-Borne*  
538 *and Zoonotic Diseases*, 7(3), 365-386.
- 539
- 540 Subra, R. (1970) Etudes écologiques sur *Culex pipiens fatigans* Wiedemann, 1828, (Diptera,  
541 Culicidae) dans une zone urbaine de savane soudanienne ouest-africaine. Lieux de repos des  
542 adultes. *Cahiers ORSTOM. Série Entomologie Médicale et Parasitologie*. 8, 353-376.

543  
544 Subra, R. (1981). Biology and control of *Culex pipiens quinquefasciatus*\* Say, 1823 (Diptera,  
545 Culicidae) with special reference to Africa. *International Journal of Tropical Insect Science*, 1(4),  
546 319-338.  
547  
548 Thomas, S., Ravishankaran, S., Justin, N. J. A., Asokan, A., Mathai, M. T. *et al.* (2017). Resting  
549 and feeding preferences of *Anopheles stephensi* in an urban setting, perennial for malaria. *Malaria*  
550 *journal*, 16(1), 1-7.  
551  
552 Triteeraprapab, S., Kanjanopas, K., Suwannadabba, S., Sangprakarn, S., Poovorawan, Y., *et al.*  
553 (2000). Transmission of the nocturnal periodic strain of *Wuchereria bancrofti* by *Culex*  
554 *quinquefasciatus*: establishing the potential for urban filariasis in Thailand. *Epidemiology &*  
555 *Infection*, 125(1), 207-212.  
556  
557 Upshur, I. F., Bose, E. A., Hart, C., & Lahondère, C. (2019). Temperature and Sugar Feeding  
558 Effects on the Activity of a Laboratory Strain of *Aedes aegypti*. *Insects*, 10(10), 347.  
559  
560 Vinauger, C., Lahondère, C., Wolff, G. H., Locke, L. T., Liaw, J. E. *et al.* (2018). Modulation of  
561 host learning in *Aedes aegypti* mosquitoes. *Current Biology*, 28(3), 333-344.  
562  
563 Vinogradova, E. B. (2000). *Culex pipiens pipiens* mosquitoes: taxonomy, distribution, ecology,  
564 physiology, genetics, applied importance and control (No. 2). *Pensoft Publishers*.  
565  
566 Vythilingam, I., Huat, T. C., & Ahmad, N. W. (2005). Research Note Transmission potential of  
567 *Wuchereria bancrofti* by *Culex quinquefasciatus* in urban areas of Malaysia. *Tropical biomedicine*,  
568 22(1), 83-85.  
569  
570 Wang, Z., Zhang, X., Li, C., Zhang, Y., Xing, D. *et al.* (2012). Vector competence of five common  
571 mosquito species in the People's Republic of China for Western equine encephalitis virus. *Vector-*  
572 *Borne and Zoonotic Diseases*, 12(7), 605-608.  
573  
574 Weitz, B. (1963). The feeding habits of *Glossina*. *Bulletin of the World Health Organization*, 28(5-  
575 6), 711.  
576  
577 World Health Organization (2020). Mosquito-borne diseases.  
578 [https://www.who.int/neglected\\_diseases/vector\\_ecology/mosquito-borne-diseases/en/](https://www.who.int/neglected_diseases/vector_ecology/mosquito-borne-diseases/en/).  
579  
580  
581  
582

583 **Table 1:** Summary of the feeding behavior and physiological characteristics of several blood-  
 584 sucking arthropods. (\*) indicates that HSPs are synthesized by a closely related species. Numbers  
 585 in parentheses indicate the reference of the studies.  
 586

|                               | <b>Feeding Duration</b> | <b>T<sub>b</sub> - T<sub>h</sub></b> | <b>T<sub>b</sub> - T<sub>ab</sub></b> | <b>Cooling method</b>             | <b>HSPs</b>   | <b>Preferred Host</b>             |
|-------------------------------|-------------------------|--------------------------------------|---------------------------------------|-----------------------------------|---------------|-----------------------------------|
| <i>Cx. quinquefasciatus</i>   | >3 min (1)              | ~6°C (1)                             | ~8°C (1)                              | evaporative cooling (1)           | unknown* (2)  | birds (3), humans (4)             |
| <i>Cx. pipiens</i>            | ~3 min (2)              | --                                   | --                                    | unknown                           | yes (2)       | birds, small mammals (5)          |
| <i>Cx. territans</i>          | >40 min (6)             | negligible (6)                       | negligible (6)                        | unknown                           | unknown       | amphibians (5)                    |
| <i>Ae. aegypti</i>            | 1.5-3.5min (7,8)        | 1-2°C (9)                            | 10°C (9)                              | unknown                           | yes (2)       | humans, other mammals (10)        |
| <i>An. stephensi</i>          | 2-4 min (9)             | 1-6°C (9)                            | 4-10°C (9)                            | evaporative cooling (9)           | unknown* (2)  | cattle (11)                       |
| <i>Glossina morsitans</i>     | 0.5-1min (12)           | 0.1-2.5°C (12)                       | 0.7-3.6°C (12)                        | unknown                           | yes (13)      | mammals, primarily ungulates (14) |
| <i>Rhodnius prolixus</i>      | > 10 min (15)           | ~5°C (15)                            | ~12°C (15)                            | Countercurrent heat exchange (15) | yes (15)      | humans, other mammals, birds (16) |
| <i>Cimex lectularius</i>      | 7.5 min (2)             | --                                   | --                                    | unknown                           | yes (2)       | humans, bats (17)                 |
| <i>Ornithodoros rostratus</i> | > 15 min (18)           | --                                   | 3°C (18)                              | evaporative cooling (18)          | unknown* (19) | mammals (18)                      |

587  
 588 References: (1) This study; (2) Benoit et al., 2011; (3) Dixit *et al.*, 2001 ; (4) Garcia-Rejon *et al.*, 2010; (5) Savage *et*  
 589 *al.*, 2007 ; (6) Personal observation; (7) Mellink I, 1982; (8) Grossman and Pappas, 1991; (9) Lahondère and Lazzari,  
 590 2012; (10) Ponlawat and Harrington, 2005; (11) Thomas *et al.*, 2017; (12) Lahondère and Lazzari, 2015; (13) Roma  
 591 *et al.*, 2019; (14) Weitz, 1963; (15) Lahondère *et al.*, 2017; (16) Sasaki *et al.*, 2003; (17) Balvin *et al.*, 2012 ; (18)  
 592 Lazzari *et al.*, 2020 ; (19) Oleaga *et al.*, 2017.  
 593  
 594  
 595  
 596  
 597  
 598  
 599  
 600  
 601  
 602  
 603  
 604  
 605  
 606  
 607

608 **Figure captions**

609

610 **Figure 1:** Schematic of the experimental blood feeding setup: 1. Water bath; 2. Tubing connecting  
611 water bath to blood feeder; 3. Blood feeder, containing cow's blood; 4. Cage containing several  
612 female *Cx. quinquefasciatus* mosquitoes; 5. FLIR thermographic camera; 6. Laptop containing  
613 ResearchIR software for video analysis.

614

615 **Figure 2:** Thermographic images of *Cx. quinquefasciatus* female mosquitoes taken shortly after  
616 landing on the blood-feeder (**A**), during blood-feeding ( $T_{blood} = 37 \pm 1^\circ\text{C}$ ) (**B**), and after feeding  
617 (**C**) and their respective body temperatures (**A'**, **B'**, **C'**).

618

619 **Figure 3:** Evolution of the temperature of the head (yellow), thorax (orange) and abdomen (red)  
620 of a *Cx. quinquefasciatus* female during feeding on a blood-meal at  $37 \pm 1^\circ\text{C}$ . Recordings were  
621 conducted at 30 frames / sec.

622

623 **Figure 4:** Average temperatures of the head, thorax and abdomen of *Cx quinquefasciatus* females  
624 (N = 10) feeding on a blood-meal at  $37 \pm 1^\circ\text{C}$ . Vertical bars represent the standard error of the  
625 mean values (S.E.M.) Letters above the error bars indicate statistical differences (Student *t*-tests,  
626  $p < 0.001$ ).

627

628 **Figure 5: A.** Thermographic image of a *Cx. quinquefasciatus* female during feeding on a blood-  
629 meal at  $37 \pm 1^\circ\text{C}$  producing and maintaining a droplet of urine at the tip of its abdomen, indicated  
630 by the arrow. **B.** Evolution of the temperature of its abdominal temperature before the droplet  
631 emission / retention (red) and after (blue). The emission of the droplet occurs 60 seconds after  
632 starting feeding (black arrow) and remains attached until the female takes off.

Figure 1

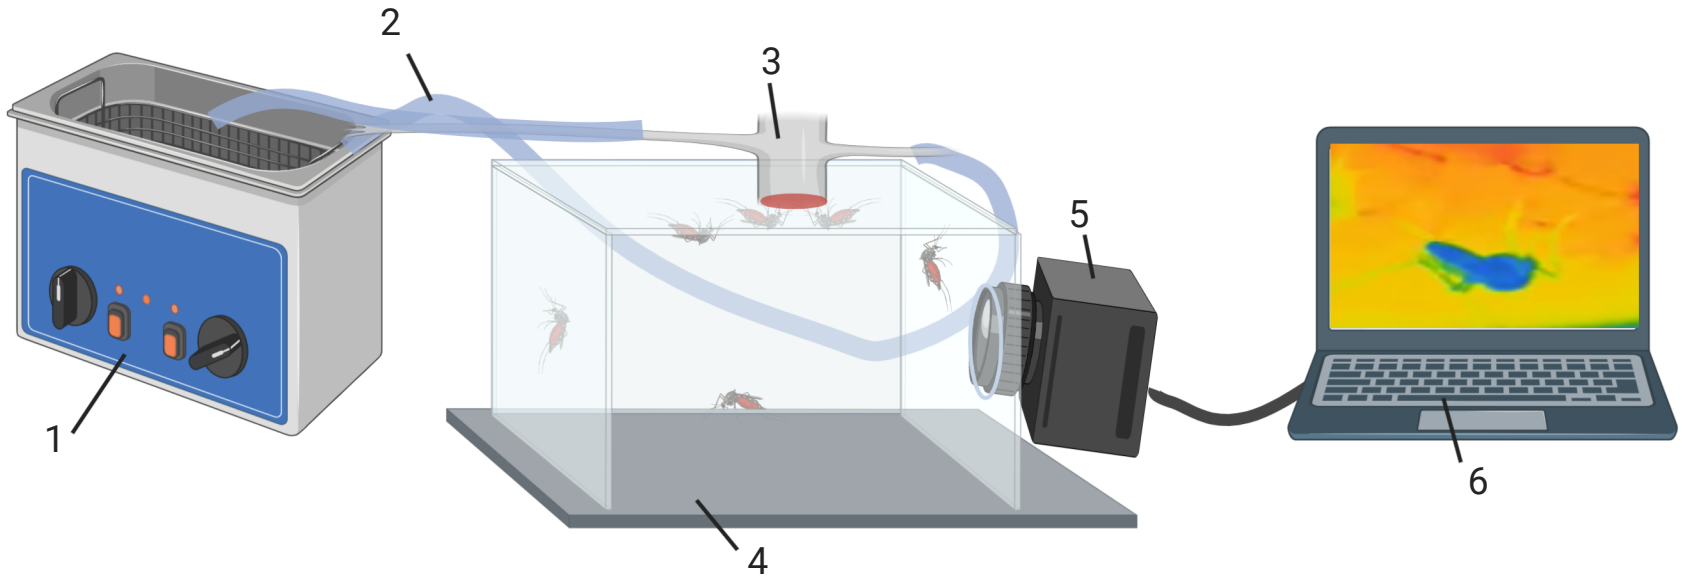

## Figure 2

**A**

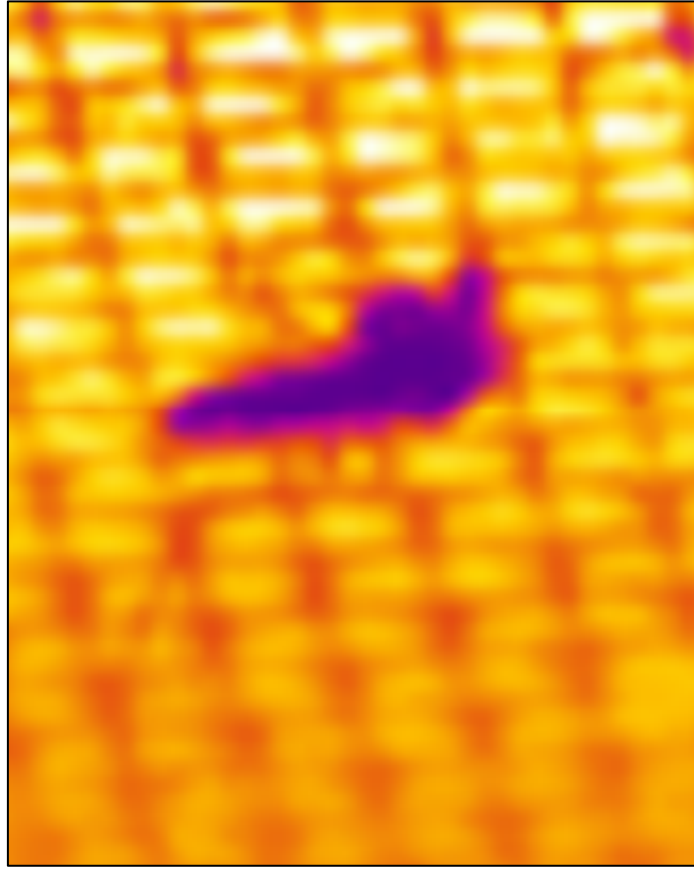

**B**

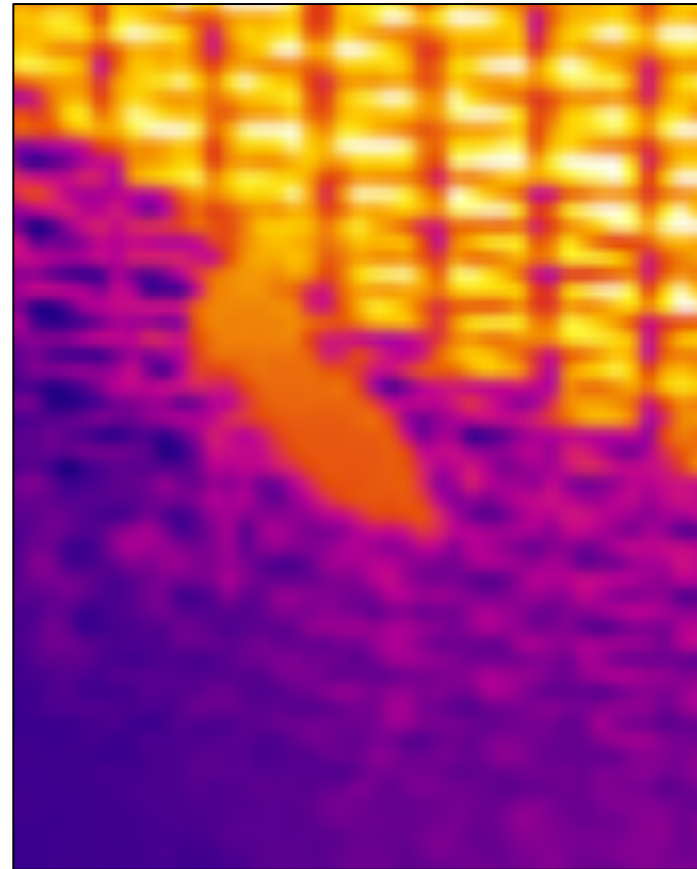

**C**

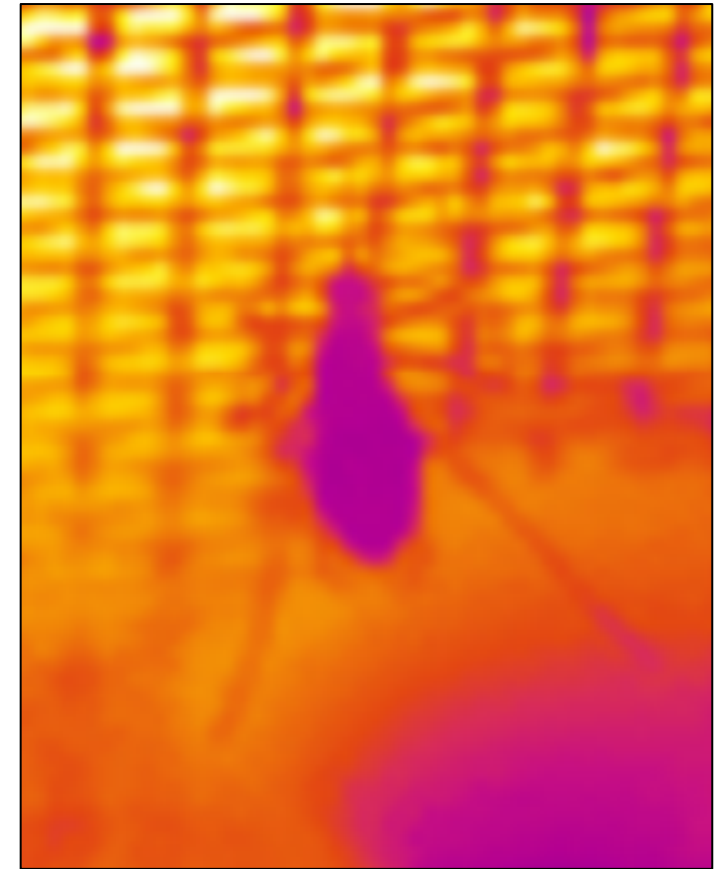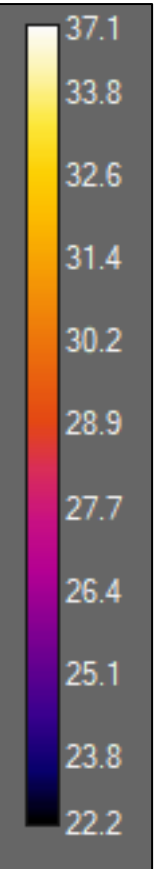

**A'**

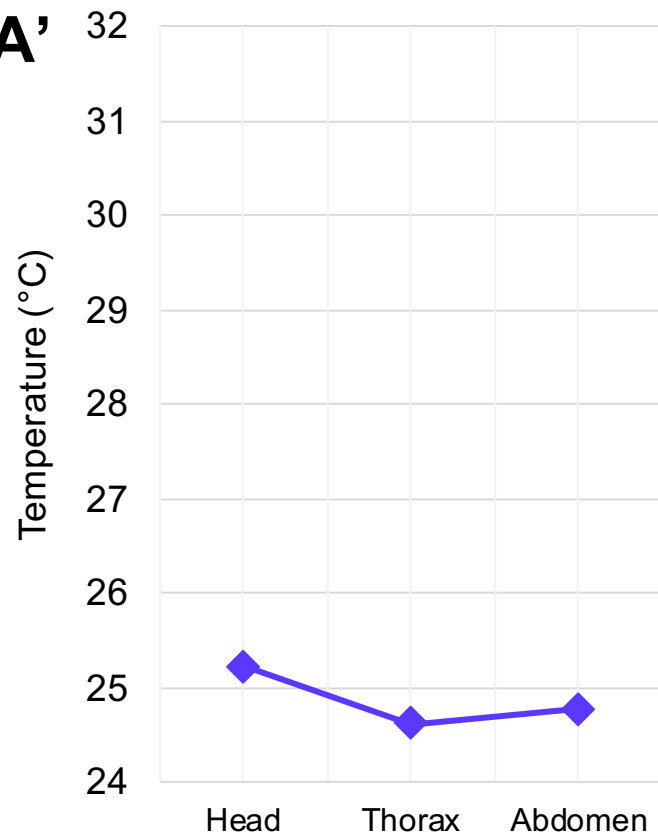

**B'**

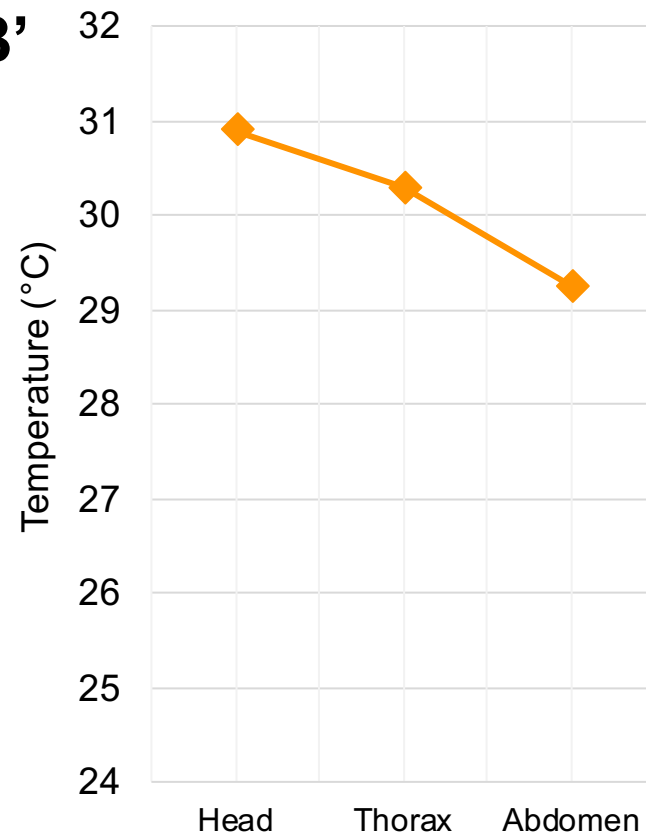

**C'**

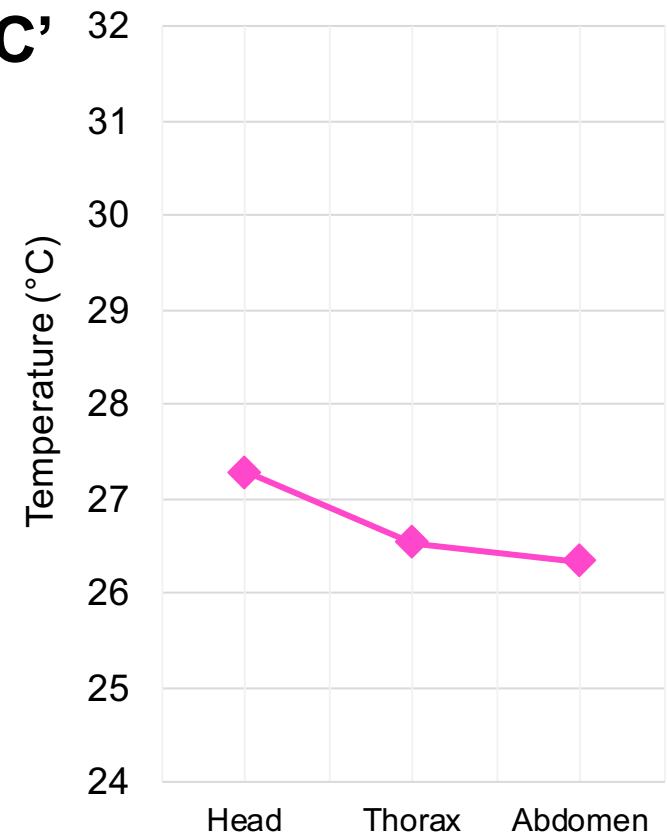

# Figure 3

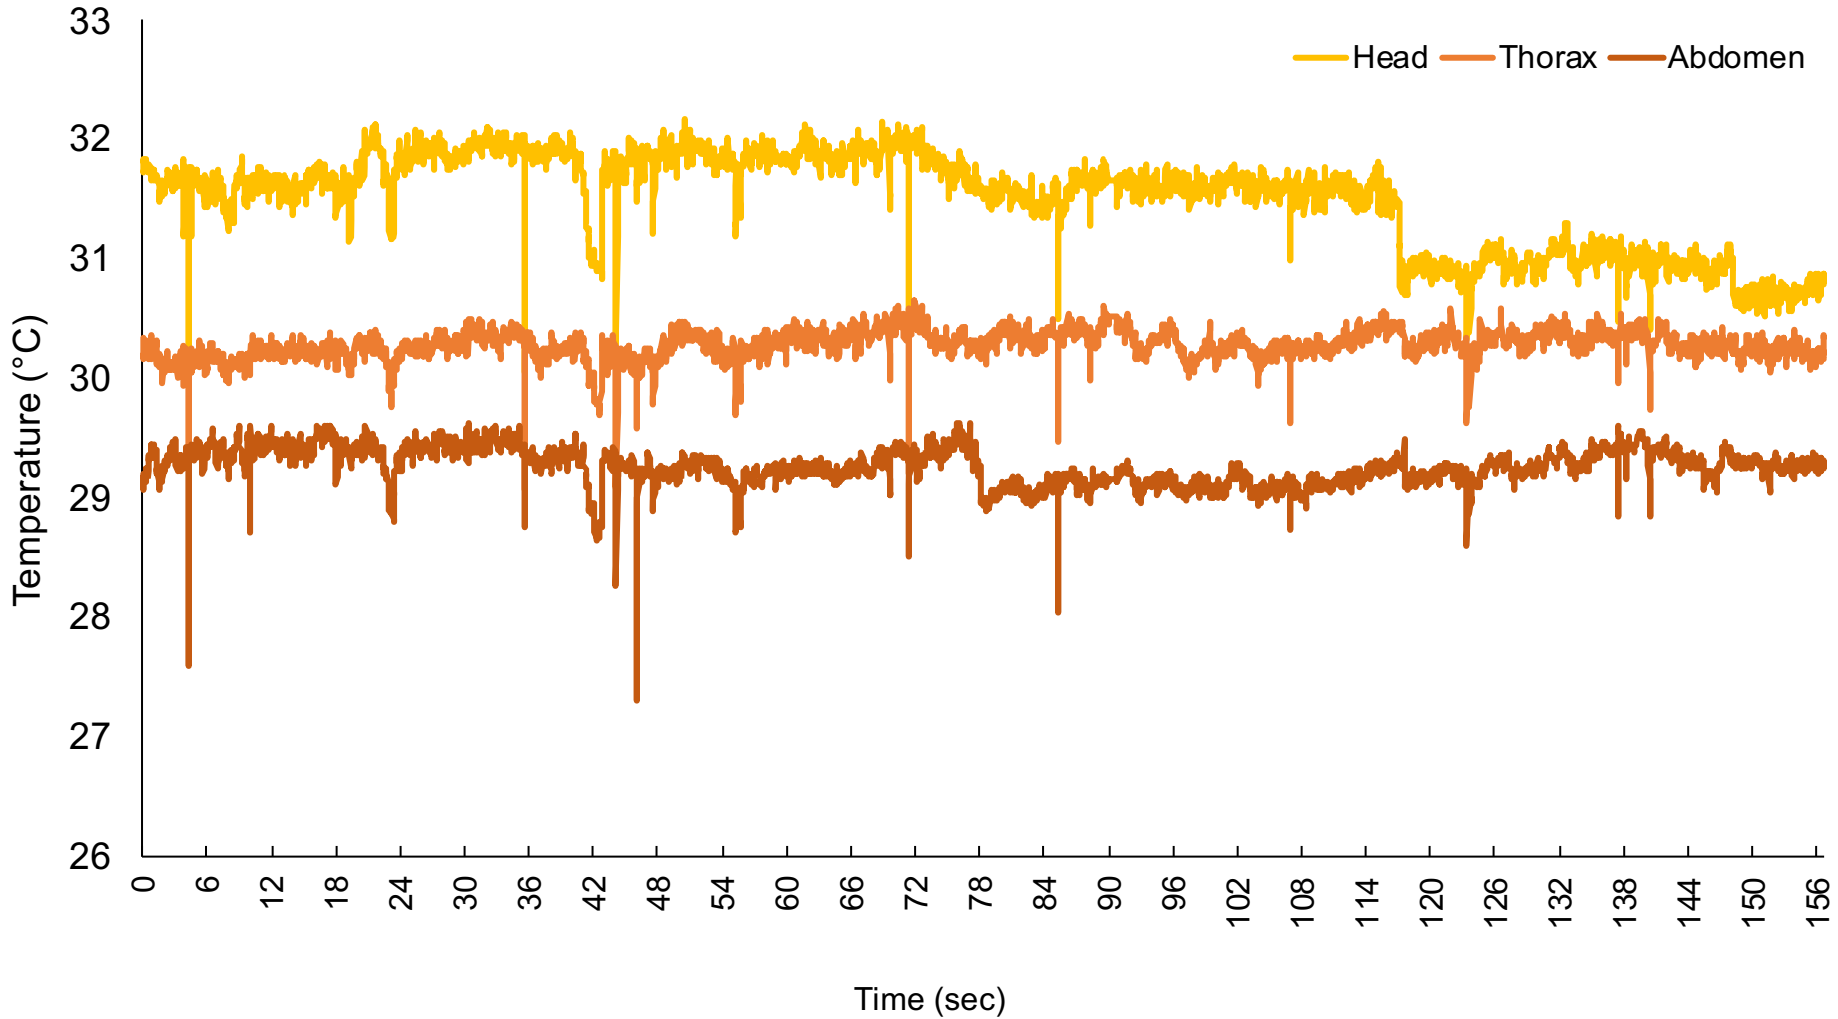



# Figure 4

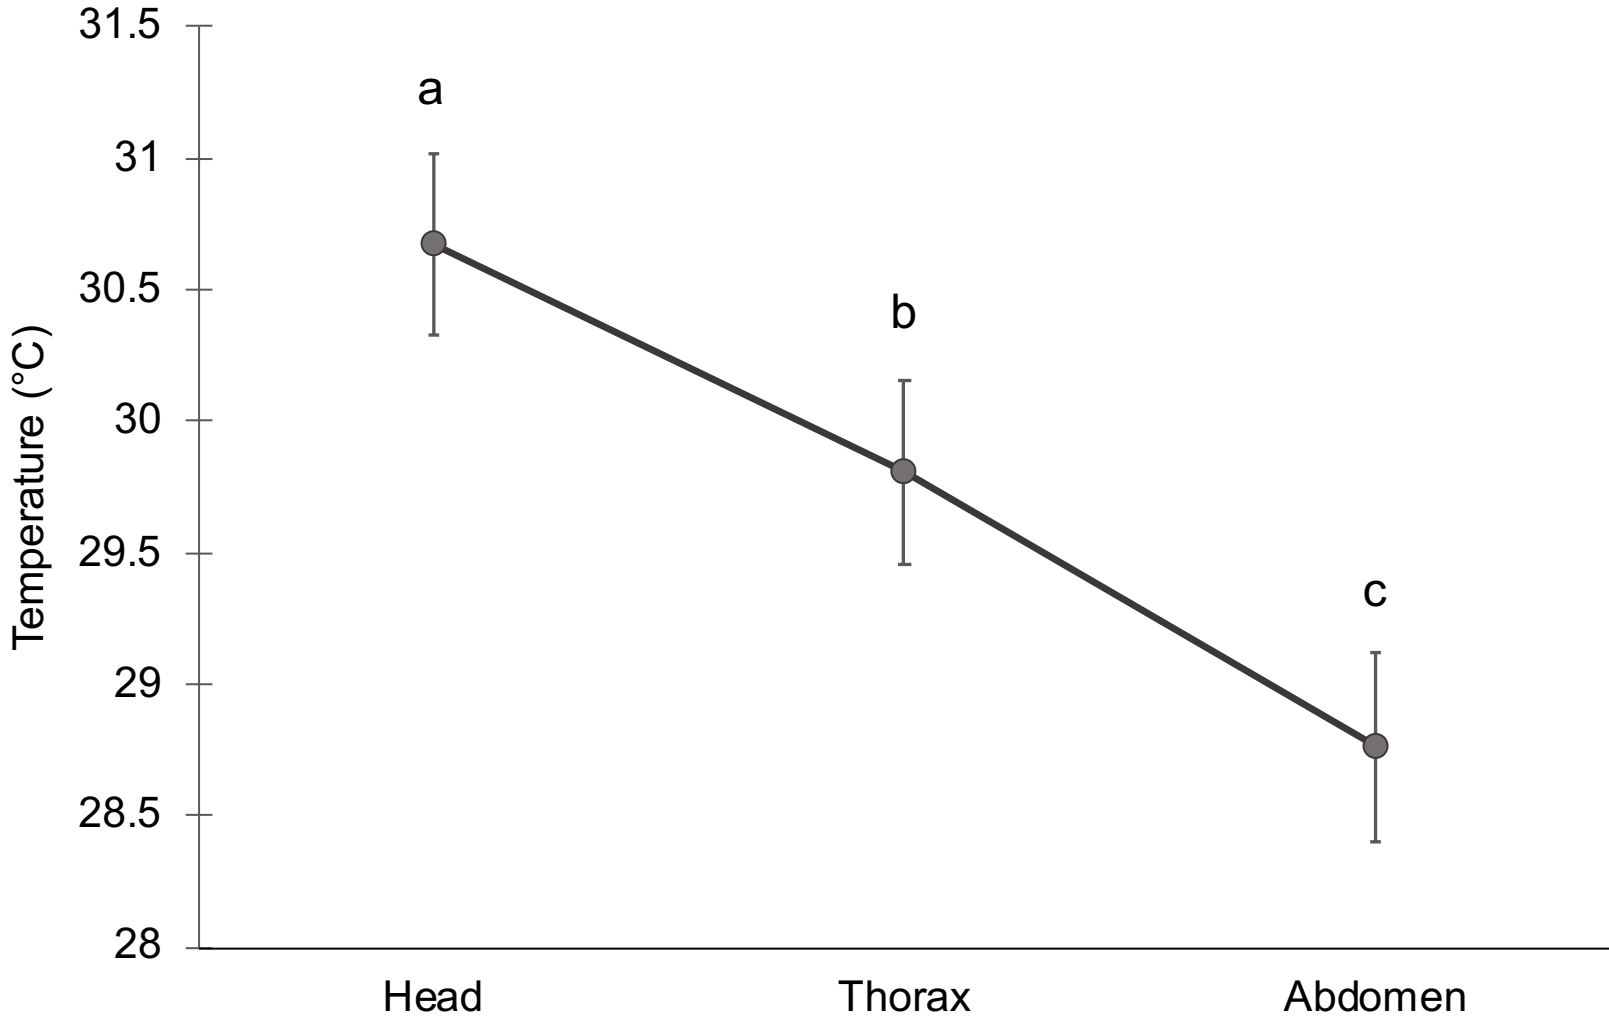

# Figure 5

## A

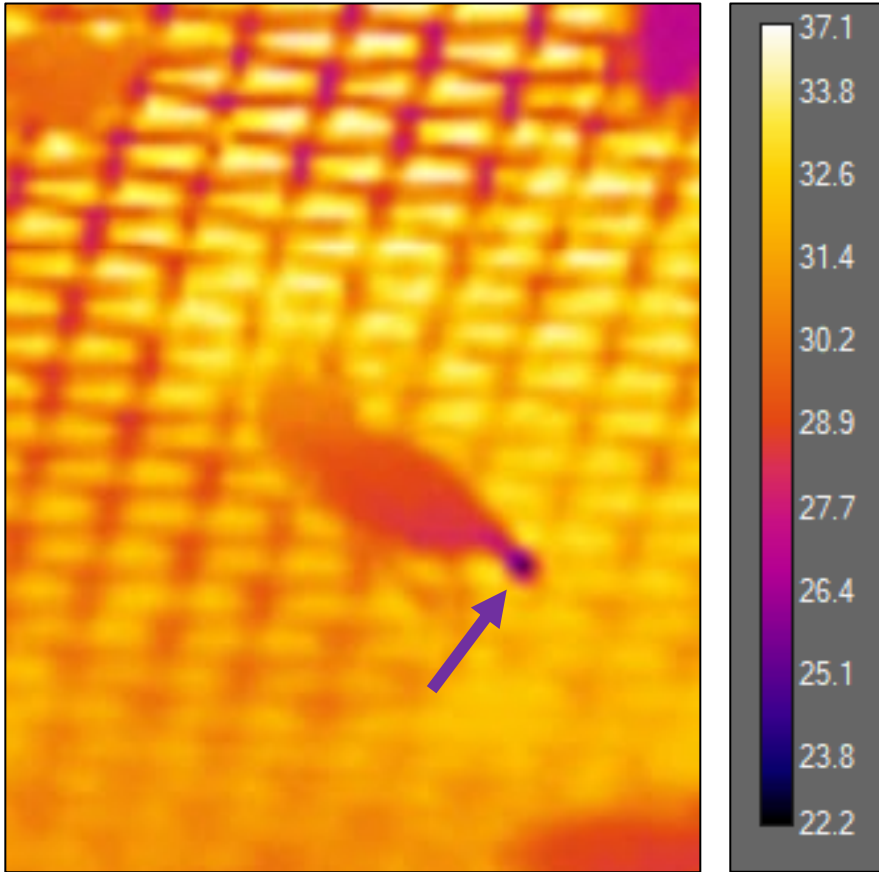

## B

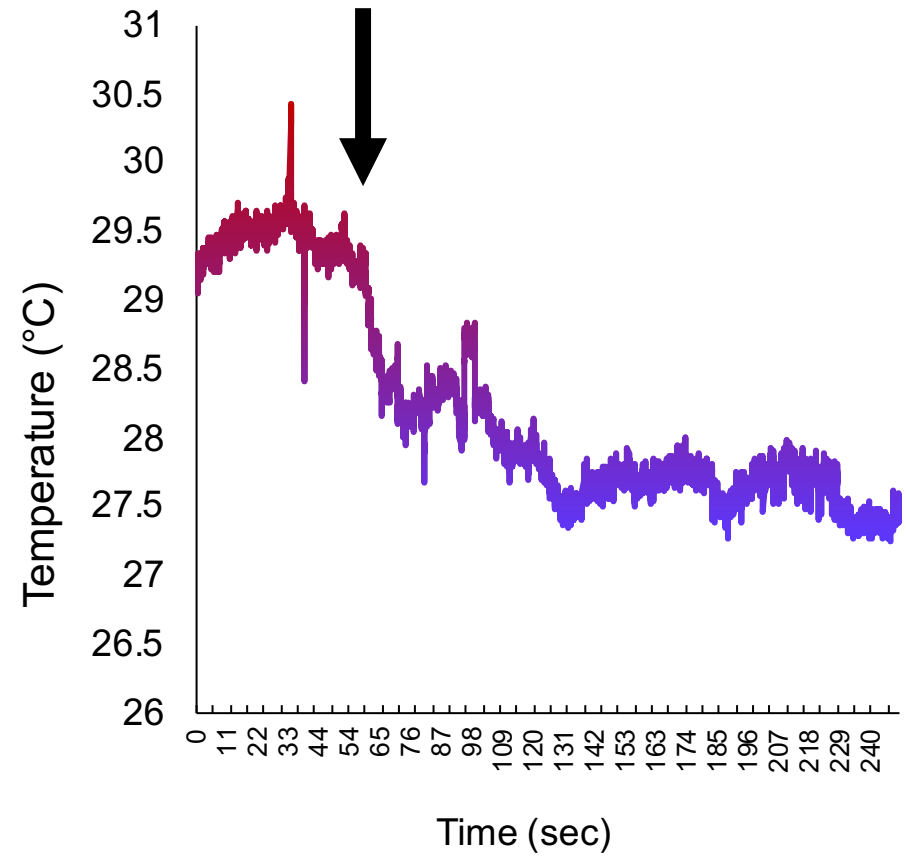

Source: https://www.biorxiv.org/content/10.1101/2020.07.07.190157v1.full.pdf
